# Supplementary material for: MimicrEE2: Genome-wide forward simulations of Evolve and Resequencing studies
Source: PLOS journal article supplement (doi:10.1371/journal.pcbi.1006413), 2018-08-16
Supplement: S2 (10.1371/journal.pcbi.1006413.s002) [file journal.pcbi.1006413.s002]

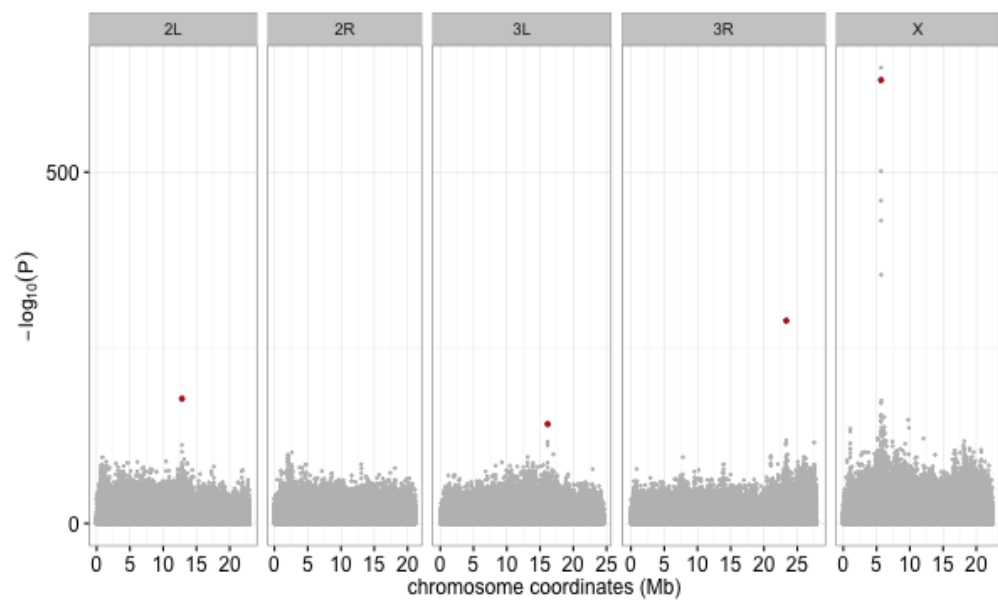

Figure 2: Manhattan plot for a simulated E&R study with 4 QTLs evolving under stabilizing selection.
